# Supplementary material for: Vulnerability of Coastal Infrastructure and Communities to Extreme Storms and Rising Sea Levels: An Improved Model for Grenada and Its Dependencies
Source: MDPI journal article supplement (doi:10.3390/land12071418), 2023-07-15
Supplement: s1 [file s1]

Archive with 2 entries (2 files):
- Tables_S2-S13.pdf
- Table_S1.pdf
