# Supplementary material for: Vulnerability of Coastal Infrastructure and Communities to Extreme Storms and Rising Sea Levels: An Improved Model for Grenada and Its Dependencies
Source: MDPI journal article supplement (doi:10.3390/land12071418), 2023-07-15
Supplement: s1 [file s1 › Table_S1.pdf]

**Table S1.** Costs for construction or maintenance of important infrastructure in Grenada. Costs relate to construction projects completed at the time of this study and are indicative for the type of feature listed. However, not all features listed are located within areas vulnerable to coastal inundation.

| Feature | Cost in 2017 (US\$)  | Type of cost                                                        | Year work commissioned or completed | Data source                                                                                                                                                                                                                                       | Notes                                                                                                                                                                 |
|---------|----------------------|---------------------------------------------------------------------|-------------------------------------|---------------------------------------------------------------------------------------------------------------------------------------------------------------------------------------------------------------------------------------------------|-----------------------------------------------------------------------------------------------------------------------------------------------------------------------|
| Roads   | 291,723              | Construction of Belle Vue road, Grenada, length 1.09 km             | 2017                                | Ministry of External Affairs, Government of India<br><a href="https://mea.gov.in/Portal/ForeignRelation/Grenada_April_2016.pdf">https://mea.gov.in/Portal/ForeignRelation/Grenada_April_2016.pdf</a>                                              |                                                                                                                                                                       |
| Bridges | 370,370 <sup>1</sup> | Construction of the Lanse bridge, Gouyave                           | 2017                                | Government of Grenada<br><a href="http://www.gov.gd/sites/default/files/docs/Documents/publication/lance-bridge-rap.pdf">http://www.gov.gd/sites/default/files/docs/Documents/publication/lance-bridge-rap.pdf</a>                                | Construction of the Lanse bridge, Gouyave is estimated to be more than EC\$ 1 million; a low-end estimate was used for the analysis instead.                          |
| Airport | 66,000,000           | Total building costs for an expansion at the Maurice Bishop Airport | 2017                                | Government of Grenada<br><a href="https://www.nowgrenada.com/2017/11/taxiway-terminals-and-by-pass-road-in-grenada-airport-expansion/">https://www.nowgrenada.com/2017/11/taxiway-terminals-and-by-pass-road-in-grenada-airport-expansion/</a>    | Costs refer to: “ <i>construction of a parallel taxiway, loading bridges, a bypass road, passenger terminals, a second apron for cargo and an emergency centre.</i> ” |
| Port1   | 55,020,000           | Total construction cost                                             | 2005                                | Cruise&Ferry.net<br><a href="https://www.cruiseandferry.net/articles/grenada-port-authority-shares-how-to-build-destination-appeal-1">https://www.cruiseandferry.net/articles/grenada-port-authority-shares-how-to-build-destination-appeal-1</a> | Melville Street Cruise Terminal                                                                                                                                       |
| Port2   | 16,523,298           | Total construction cost                                             | 2000                                | Grenada Ports Authority<br><a href="http://www.grenadaports.com/">http://www.grenadaports.com/</a>                                                                                                                                                | Cargo port costs.                                                                                                                                                     |
| Port3   | 9,259,250            | Total construction cost                                             | upcoming                            | Grenada Ports Authority<br><a href="http://www.grenadaports.com/">http://www.grenadaports.com/</a>                                                                                                                                                | Tyrell Bay port project.                                                                                                                                              |

<sup>1</sup> Exchange rate for East Caribbean Dollar to US Dollar in 2017: 0.32037, calculated by xe.com  
<https://www.xe.com/currencycharts/?from=XCD&to=USD&view=2Y%20>

**Table S1. cont'd.** Costs for construction or maintenance of important infrastructure in Grenada. Costs relate to construction projects completed at the time of this study and are indicative for the type of feature listed. However, not all features listed are located within areas vulnerable to coastal inundation.

| Feature                 | Cost in 2017 (US\$)  | Type of cost                                | Year work commissioned or completed | Data source                                                                                                                                                                               | Notes                                                                                                                                    |
|-------------------------|----------------------|---------------------------------------------|-------------------------------------|-------------------------------------------------------------------------------------------------------------------------------------------------------------------------------------------|------------------------------------------------------------------------------------------------------------------------------------------|
| Electricity plant       | 9,748,434            | Total construction cost                     | 2007                                | Grenada Electricity Services Ltd<br><a href="http://grenlec.com/Portals/0/AnnualReportsPDF/Report2007.pdf">http://grenlec.com/Portals/0/AnnualReportsPDF/Report2007.pdf</a>               | Loan procured to for construction of facilities in Queen's Park and Grand Anse, Grenada.                                                 |
| Grand Anse Sewer System | 7,703,411            | Total project cost for Grand Anse component | 1992                                | Technical Review of Grand Anse Sewer Project<br><a href="https://www.ircwash.org/sites/default/files/826-GD92-9681.pdf">https://www.ircwash.org/sites/default/files/826-GD92-9681.pdf</a> | The Grand Anse Sewer Project is funded by USAID/RDO/C under the Grenada Infrastructure Revitalization III Project. Retrieved from p. 19. |
| Dams                    | 169,500 <sup>2</sup> | Costs include rebuilding of the dam         | 2017                                | CREWS, 2017<br><a href="https://www.giz.de/en/downloads/2017giz-de-gcf-grenada-esia-esmp.pdf">https://www.giz.de/en/downloads/2017giz-de-gcf-grenada-esia-esmp.pdf</a>                    | Les Avocats dam reservoir, Grenada.                                                                                                      |
| Water reservoirs        | 56,500 <sup>2</sup>  | Total costs to build a storage pond         | 2017                                | CREWS, 2017<br><a href="https://www.giz.de/en/downloads/2017giz-de-gcf-grenada-esia-esmp.pdf">https://www.giz.de/en/downloads/2017giz-de-gcf-grenada-esia-esmp.pdf</a>                    | Petit Etang water reservoir, Grenada.                                                                                                    |
| Bus terminals           | 5,020,000            | Total construction cost                     | 2005                                | Grenada Ports Authority handbook<br><a href="https://issuu.com/landmarine/docs/grenada">https://issuu.com/landmarine/docs/grenada</a>                                                     | Melville Bus Terminal                                                                                                                    |

<sup>2</sup> Exchange rate for East Caribbean Dollar to Euro in 2017 was the annual average rate from [statista.com](https://www.statista.com/statistics/412794/euro-to-u-s-dollar-annual-average-exchange-rate/)  
<https://www.statista.com/statistics/412794/euro-to-u-s-dollar-annual-average-exchange-rate/>

**Table S1. cont'd.** Costs for construction or maintenance of important infrastructure in Grenada. Costs relate to construction projects completed at the time of this study and are indicative for the type of feature listed. However, not all features listed are located within areas vulnerable to coastal inundation.

| Feature    | Cost in 2017 (US\$) | Type of cost                                  | Year work commissioned or completed | Data source                                                                                                                                                                                                                                 | Notes                                                                                  |
|------------|---------------------|-----------------------------------------------|-------------------------------------|---------------------------------------------------------------------------------------------------------------------------------------------------------------------------------------------------------------------------------------------|----------------------------------------------------------------------------------------|
| Hospitals1 | 99,499              | Total maintenance and supply costs for 1 year | 2016                                | Government of Grenada Estimates of Revenue and Expenditure 2017 <a href="http://www.caribbeanelections.com/eDocs/budget/gd_budget/gd_estimates_2017.pdf">http://www.caribbeanelections.com/eDocs/budget/gd_budget/gd_estimates_2017.pdf</a> | Includes maintenance and supplies costs only, for 1 year, for Princess Royal Hospital. |
| Hospitals2 | 175,030             | Total maintenance and supply costs for 1 year | 2016                                | Government of Grenada Estimates of Revenue and Expenditure 2017 <a href="http://www.caribbeanelections.com/eDocs/budget/gd_budget/gd_estimates_2017.pdf">http://www.caribbeanelections.com/eDocs/budget/gd_budget/gd_estimates_2017.pdf</a> | Includes maintenance and supplies costs only, for 1 year, for Princess Alice Hospital. |
