# Supplementary material for: Vulnerability of Coastal Infrastructure and Communities to Extreme Storms and Rising Sea Levels: An Improved Model for Grenada and Its Dependencies
Source: MDPI journal article supplement (doi:10.3390/land12071418), 2023-07-15
Supplement: s1 [file s1 › Tables_S2-S13.pdf]

**Table S2.** Summary of modelled inundation impacts on coastal features in Grenada, Carriacou and Petite Martinique for Scenario Ivan\_050: Ivan-type storm with present-day sea levels.

|                           | Grenada                          |                      |                 | Carriacou                        |                      |                 | Petite Martinique                |                      |                 |
|---------------------------|----------------------------------|----------------------|-----------------|----------------------------------|----------------------|-----------------|----------------------------------|----------------------|-----------------|
| Feature                   | Area affected (km <sup>2</sup> ) | Length affected (km) | Number affected | Area affected (km <sup>2</sup> ) | Length affected (km) | Number affected | Area affected (km <sup>2</sup> ) | Length affected (km) | Number affected |
| Airports                  |                                  |                      |                 | 0.060                            |                      |                 |                                  |                      |                 |
| Bridges                   |                                  | 0.164                | 12              |                                  |                      |                 |                                  |                      |                 |
| Buildings                 | 0.020                            |                      | 195             | 0.005                            |                      | 70              | 0.001                            |                      | 10              |
| Emergency shelters        |                                  |                      | 1               |                                  |                      |                 |                                  |                      |                 |
| Land area                 | 2.799                            |                      |                 | 1.221                            |                      |                 | 0.041                            |                      |                 |
| Ports                     |                                  |                      | 1               |                                  |                      | 1               |                                  |                      |                 |
| Religious centres         |                                  |                      | 1               |                                  |                      |                 |                                  |                      |                 |
| Roads                     |                                  | 9.870                |                 |                                  | 4.181                |                 |                                  | 0.106                |                 |
| Seaports                  | 0.018                            |                      |                 | 0.007                            |                      |                 |                                  |                      |                 |
| Transport terminal - boat |                                  |                      | 2               |                                  |                      | 1               |                                  |                      |                 |
| Watercourse               |                                  | 6.774                |                 |                                  | 0.972                |                 |                                  | 0.035                |                 |

**Table S3.** Summary of modelled inundation impacts on coastal features in Grenada, Carriacou and Petite Martinique for Scenario Ivan\_107: Ivan-type storm with 0.5 m sea level rise.

|                           | Grenada                          |                      |                 | Carriacou                        |                      |                 | Petite Martinique                |                      |                 |
|---------------------------|----------------------------------|----------------------|-----------------|----------------------------------|----------------------|-----------------|----------------------------------|----------------------|-----------------|
| Feature                   | Area affected (km <sup>2</sup> ) | Length affected (km) | Number affected | Area affected (km <sup>2</sup> ) | Length affected (km) | Number affected | Area affected (km <sup>2</sup> ) | Length affected (km) | Number affected |
| Airports                  |                                  |                      |                 | 0.060                            |                      |                 |                                  |                      |                 |
| Bridges                   |                                  | 0.261                | 14              |                                  |                      |                 |                                  |                      |                 |
| Buildings                 | 0.032                            |                      | 361             | 0.009                            |                      | 125             | 0.001                            |                      | 25              |
| Emergency shelters        |                                  |                      | 1               |                                  |                      |                 |                                  |                      |                 |
| Land area                 | 3.251                            |                      |                 | 1.586                            |                      |                 | 0.049                            |                      |                 |
| Ports                     |                                  |                      | 1               |                                  |                      | 1               |                                  |                      |                 |
| Religious centres         |                                  |                      | 1               |                                  |                      | 1               |                                  |                      |                 |
| Roads                     |                                  | 13.047               |                 |                                  | 6.865                |                 |                                  | 0.193                |                 |
| Seaports                  | 0.021                            |                      |                 | 0.007                            |                      |                 |                                  |                      |                 |
| Transport terminal - boat |                                  |                      | 2               |                                  |                      | 1               |                                  |                      |                 |
| Watercourse               |                                  | 7.419                |                 |                                  | 0.993                |                 |                                  | 0.062                |                 |

**Table S4.** Summary of modelled inundation impacts on coastal features in Grenada, Carriacou and Petite Martinique for Scenario Ivan\_167: Ivan-type storm with 1.17 m sea level rise.

|                           | Grenada                          |                      |                 | Carriacou                        |                      |                 | Petite Martinique                |                      |                 |
|---------------------------|----------------------------------|----------------------|-----------------|----------------------------------|----------------------|-----------------|----------------------------------|----------------------|-----------------|
| Feature                   | Area affected (km <sup>2</sup> ) | Length affected (km) | Number affected | Area affected (km <sup>2</sup> ) | Length affected (km) | Number affected | Area affected (km <sup>2</sup> ) | Length affected (km) | Number affected |
| Airports                  | 0.001                            |                      |                 | 0.066                            |                      |                 |                                  |                      |                 |
| Bridges                   |                                  | 0.350                | 24              |                                  | 0.006                | 1               |                                  |                      |                 |
| Buildings                 | 0.049                            |                      | 525             | 0.017                            |                      | 227             | 0.002                            |                      | 34              |
| Emergency shelters        |                                  |                      | 1               |                                  |                      |                 |                                  |                      |                 |
| Land area                 | 3.780                            |                      |                 | 1.815                            |                      |                 | 0.057                            |                      |                 |
| Medical facilities        |                                  |                      | 1               |                                  |                      |                 |                                  |                      |                 |
| Police facilities         |                                  |                      | 1               |                                  |                      |                 |                                  |                      |                 |
| Ports                     |                                  |                      | 1               |                                  |                      | 1               |                                  |                      |                 |
| Religious centres         |                                  |                      | 1               |                                  |                      | 1               |                                  |                      |                 |
| Roads                     |                                  | 16.899               |                 |                                  | 8.503                |                 |                                  | 0.229                |                 |
| Seaports                  | 0.026                            |                      |                 | 0.008                            |                      |                 |                                  |                      |                 |
| Transport terminal - boat |                                  |                      | 2               |                                  |                      | 1               |                                  |                      |                 |
| Watercourse               |                                  | 8.737                |                 |                                  | 1.095                |                 |                                  | 0.089                |                 |

**Table S5.** Summary of modelled inundation impacts on coastal features in Grenada, Carriacou and Petite Martinique for Scenario Lenny\_050: Lenny-type storm with present-day sea levels.

|                           | Grenada                          |                      |                 | Carriacou                        |                      |                 | Petite Martinique                |                      |                 |
|---------------------------|----------------------------------|----------------------|-----------------|----------------------------------|----------------------|-----------------|----------------------------------|----------------------|-----------------|
| Feature                   | Area affected (km <sup>2</sup> ) | Length affected (km) | Number affected | Area affected (km <sup>2</sup> ) | Length affected (km) | Number affected | Area affected (km <sup>2</sup> ) | Length affected (km) | Number affected |
| Airports                  |                                  |                      |                 | 0.007                            |                      |                 |                                  |                      |                 |
| Bridges                   |                                  | 0.128                | 11              |                                  |                      |                 |                                  |                      |                 |
| Buildings                 | 0.014                            |                      | 130             | 0.002                            |                      | 41              |                                  |                      | 8               |
| Emergency shelters        |                                  |                      | 1               |                                  |                      |                 |                                  |                      |                 |
| Land area                 | 2.295                            |                      |                 | 0.856                            |                      |                 | 0.039                            |                      |                 |
| Ports                     |                                  |                      |                 |                                  |                      | 1               |                                  |                      |                 |
| Religious centres         |                                  |                      | 1               |                                  |                      |                 |                                  |                      |                 |
| Roads                     |                                  | 7.398                |                 |                                  | 2.334                |                 |                                  | 0.092                |                 |
| Seaports                  | 0.016                            |                      |                 | 0.005                            |                      |                 |                                  |                      |                 |
| Transport terminal - boat |                                  |                      | 2               |                                  |                      | 1               |                                  |                      |                 |
| Watercourse               |                                  | 5.481                |                 |                                  | 0.908                |                 |                                  | 0.035                |                 |

**Table S6.** Summary of modelled inundation impacts on coastal features in Grenada, Carriacou and Petite Martinique for Scenario Lenny\_107: Lenny-type storm with 0.5 m sea level rise.

|                           | Grenada                          |                      |                 | Carriacou                        |                      |                 | Petite Martinique                |                      |                 |
|---------------------------|----------------------------------|----------------------|-----------------|----------------------------------|----------------------|-----------------|----------------------------------|----------------------|-----------------|
| Feature                   | Area affected (km <sup>2</sup> ) | Length affected (km) | Number affected | Area affected (km <sup>2</sup> ) | Length affected (km) | Number affected | Area affected (km <sup>2</sup> ) | Length affected (km) | Number affected |
| Airports                  |                                  |                      |                 | 0.024                            |                      |                 |                                  |                      |                 |
| Bridges                   |                                  | 0.216                | 14              |                                  |                      |                 |                                  |                      |                 |
| Buildings                 | 0.021                            |                      | 230             | 0.005                            |                      | 86              | 0.001                            |                      | 22              |
| Emergency shelters        |                                  |                      | 1               |                                  |                      |                 |                                  |                      |                 |
| Land area                 | 2.635                            |                      |                 | 1.065                            |                      |                 | 0.046                            |                      |                 |
| Ports                     |                                  |                      |                 |                                  |                      | 1               |                                  |                      |                 |
| Religious centres         |                                  |                      | 1               |                                  |                      |                 |                                  |                      |                 |
| Roads                     |                                  | 9.371                |                 |                                  | 3.511                |                 |                                  | 0.158                |                 |
| Seaports                  | 0.020                            |                      |                 | 0.007                            |                      |                 |                                  |                      |                 |
| Transport terminal - boat |                                  |                      | 2               |                                  |                      | 1               |                                  |                      |                 |
| Watercourse               |                                  | 6.208                |                 |                                  | 0.963                |                 |                                  | 0.062                |                 |

**Table S7.** Summary of modelled inundation impacts on coastal features in Grenada, Carriacou and Petite Martinique for Scenario Lenny\_167: Lenny-type storm with 1.17 m sea level rise.

|                           | Grenada                          |                      |                 | Carriacou                        |                      |                 | Petite Martinique                |                      |                 |
|---------------------------|----------------------------------|----------------------|-----------------|----------------------------------|----------------------|-----------------|----------------------------------|----------------------|-----------------|
| Feature                   | Area affected (km <sup>2</sup> ) | Length affected (km) | Number affected | Area affected (km <sup>2</sup> ) | Length affected (km) | Number affected | Area affected (km <sup>2</sup> ) | Length affected (km) | Number affected |
| Airports                  | 0.001                            |                      |                 | 0.028                            |                      |                 |                                  |                      |                 |
| Bridges                   |                                  | 0.199                | 17              |                                  |                      |                 |                                  |                      |                 |
| Buildings                 | 0.036                            |                      | 412             | 0.013                            |                      | 179             | 0.002                            |                      | 32              |
| Emergency shelters        |                                  |                      | 1               |                                  |                      |                 |                                  |                      |                 |
| Land area                 | 3.104                            |                      |                 | 1.375                            |                      |                 | 0.054                            |                      |                 |
| Medical facilities        |                                  |                      | 1               |                                  |                      |                 |                                  |                      |                 |
| Ports                     |                                  |                      | 1               |                                  |                      |                 |                                  |                      |                 |
| Religious centres         |                                  |                      | 1               |                                  |                      | 1               |                                  |                      |                 |
| Roads                     |                                  |                      | 1               |                                  |                      | 1               |                                  |                      |                 |
| Seaports                  |                                  | 12.602               |                 |                                  | 6.066                |                 |                                  | 0.214                |                 |
| Transport terminal - boat | 0.023                            |                      |                 | 0.008                            |                      |                 |                                  |                      |                 |
| Watercourse               |                                  |                      | 2               |                                  |                      | 1               |                                  |                      |                 |

**Table S8.** Summary of modelled inundation impacts on coastal features in Grenada, Carriacou and Petite Martinique for Scenario 100yr\_050: 100yr-type storm with present-day sea levels.

|                           | Grenada                          |                      |                 | Carriacou                        |                      |                 | Petite Martinique                |                      |                 |
|---------------------------|----------------------------------|----------------------|-----------------|----------------------------------|----------------------|-----------------|----------------------------------|----------------------|-----------------|
| Feature                   | Area affected (km <sup>2</sup> ) | Length affected (km) | Number affected | Area affected (km <sup>2</sup> ) | Length affected (km) | Number affected | Area affected (km <sup>2</sup> ) | Length affected (km) | Number affected |
| Airports                  |                                  |                      |                 | 0.057                            |                      |                 |                                  |                      |                 |
| Bridges                   |                                  | 0.153                | 12              |                                  |                      |                 |                                  |                      |                 |
| Buildings                 | 0.018                            |                      | 174             | 0.004                            |                      | 66              | 0.001                            |                      | 10              |
| Emergency shelters        |                                  |                      | 1               |                                  |                      |                 |                                  |                      |                 |
| Land area                 | 2.799                            |                      |                 | 1.221                            |                      |                 | 0.041                            |                      |                 |
| Ports                     |                                  |                      |                 |                                  |                      | 1               |                                  |                      |                 |
| Religious centres         |                                  |                      | 1               |                                  |                      |                 |                                  |                      |                 |
| Roads                     |                                  | 9.333                |                 |                                  | 3.882                |                 |                                  | 0.106                |                 |
| Seaports                  |                                  |                      |                 |                                  |                      |                 |                                  |                      |                 |
| Transport terminal - boat |                                  |                      | 2               |                                  |                      | 1               |                                  |                      |                 |
| Watercourse               |                                  | 7.030                |                 |                                  | 0.972                |                 |                                  | 0.043                |                 |

**Table S9.** Summary of modelled inundation impacts on coastal features in Grenada, Carriacou and Petite Martinique for Scenario 100yr\_107: 100yr-type storm with 0.5 m sea level rise.

|                           | Grenada                          |                      |                 | Carriacou                        |                      |                 | Petite Martinique                |                      |                 |
|---------------------------|----------------------------------|----------------------|-----------------|----------------------------------|----------------------|-----------------|----------------------------------|----------------------|-----------------|
| Feature                   | Area affected (km <sup>2</sup> ) | Length affected (km) | Number affected | Area affected (km <sup>2</sup> ) | Length affected (km) | Number affected | Area affected (km <sup>2</sup> ) | Length affected (km) | Number affected |
| Airports                  |                                  |                      |                 | 0.061                            |                      |                 |                                  |                      |                 |
| Bridges                   |                                  | 0.246                | 16              |                                  |                      |                 |                                  |                      |                 |
| Buildings                 | 0.030                            |                      | 346             | 0.008                            |                      | 112             | 0.001                            |                      | 25              |
| Emergency shelters        |                                  |                      | 1               |                                  |                      |                 |                                  |                      |                 |
| Land area                 | 3.263                            |                      |                 | 1.586                            |                      |                 | 0.049                            |                      |                 |
| Ports                     |                                  |                      | 1               |                                  |                      | 1               |                                  |                      |                 |
| Religious centres         |                                  |                      | 1               |                                  |                      |                 |                                  |                      |                 |
| Roads                     |                                  | 12.894               |                 |                                  | 6.532                |                 |                                  | 0.193                |                 |
| Seaports                  | 0.022                            |                      |                 | 0.008                            |                      |                 |                                  |                      |                 |
| Transport terminal - boat |                                  |                      | 2               |                                  |                      | 1               |                                  |                      |                 |
| Watercourse               |                                  | 7.782                |                 |                                  | 0.993                |                 |                                  | 0.062                |                 |

**Table S10.** Summary of modelled inundation impacts on coastal features in Grenada, Carriacou and Petite Martinique for Scenario 100yr\_167: 100yr-type storm with 1.17 m sea level rise.

|                           | Grenada                          |                      |                 | Carriacou                        |                      |                 | Petite Martinique                |                      |                 |
|---------------------------|----------------------------------|----------------------|-----------------|----------------------------------|----------------------|-----------------|----------------------------------|----------------------|-----------------|
| Feature                   | Area affected (km <sup>2</sup> ) | Length affected (km) | Number affected | Area affected (km <sup>2</sup> ) | Length affected (km) | Number affected | Area affected (km <sup>2</sup> ) | Length affected (km) | Number affected |
| Airports                  | 0.001                            |                      |                 | 0.067                            |                      |                 |                                  |                      |                 |
| Bridges                   |                                  | 0.211                | 14              |                                  | 0.162                | 10              |                                  |                      |                 |
| Buildings                 | 0.049                            |                      | 532             | 0.016                            |                      | 226             | 0.002                            |                      | 32              |
| Emergency shelters        |                                  |                      | 1               |                                  |                      |                 |                                  |                      |                 |
| Land area                 | 3.814                            |                      |                 | 1.829                            |                      |                 | 0.056                            |                      |                 |
| Medical facilities        |                                  |                      | 1               |                                  |                      |                 |                                  |                      |                 |
| Ports                     |                                  |                      | 1               |                                  |                      | 1               |                                  |                      |                 |
| Religious centres         |                                  |                      | 1               |                                  |                      | 1               |                                  |                      |                 |
| Roads                     |                                  | 16.808               |                 |                                  | 8.366                |                 |                                  | 0.219                |                 |
| Seaports                  | 0.026                            |                      |                 | 0.008                            |                      |                 |                                  |                      |                 |
| Transport terminal - boat |                                  |                      | 2               |                                  |                      | 1               |                                  |                      |                 |
| Watercourse               |                                  | 9.017                |                 |                                  | 1.102                |                 |                                  | 0.087                |                 |

**Table S11.** Summary of modelled inundation impacts on broad land use/land cover types in coastal areas, for an Ivan-type storm under different sea level scenarios. Values represent total combined areas for Grenada and Carriacou; land cover data for Petite Martinique were unavailable.

| Scenario                    | Ivan_050                         | Ivan_107 | Ivan_167 |
|-----------------------------|----------------------------------|----------|----------|
| Land use/land cover type    | Area affected (km <sup>2</sup> ) |          |          |
| Agriculture                 | 0.772                            | 1.042    | 1.253    |
| Airport Land/Infrastructure | 0.027                            | 0.027    | 0.028    |
| Aviation (i.e. runways)     | 0.006                            | 0.006    | 0.008    |
| Commercial & Industrial     | 0.026                            | 0.041    | 0.062    |
| Conservation Areas          | 0.588                            | 0.763    | 0.864    |
| Landfill & Degraded Land    | 0.004                            | 0.005    | 0.007    |
| Forest                      | 1.125                            | 1.262    | 1.472    |
| Hydrological Features       | 0.413                            | 0.461    | 0.542    |
| Islands (coastal)           | 0.059                            | 0.066    | 0.074    |
| Livestock/Grazing Land      | 0.048                            | 0.070    | 0.043    |
| Marine Infrastructure       | 0.001                            | 0.002    | 0.003    |
| Mining                      | 0.000                            | 0.000    | 0.000    |
| Recreational                | 0.043                            | 0.056    | 0.063    |
| Residential                 | 0.334                            | 0.403    | 0.476    |
| Urban                       | 0.018                            | 0.027    | 0.033    |

**Table S12.** Summary of modelled inundation impacts on broad land use/land cover types in coastal areas, for a Lenny-type storm under different sea level scenarios. Values represent total combined areas for Grenada and Carriacou; land cover data for Petite Martinique were unavailable.

| Scenario                    | Lenny_050                        | Lenny_107 | Lenny_167 |
|-----------------------------|----------------------------------|-----------|-----------|
| Land use/land cover type    | Area affected (km <sup>2</sup> ) |           |           |
| Agriculture                 | 0.512                            | 0.696     | 0.935     |
| Airport Land/Infrastructure | 0.002                            | 0.012     | 0.013     |
| Aviation (i.e. runways)     | 0.000                            | 0.001     | 0.002     |
| Commercial & Industrial     | 0.017                            | 0.029     | 0.050     |
| Conservation Areas          | 0.373                            | 0.462     | 0.591     |
| Landfill & Degraded Land    | 0.003                            | 0.004     | 0.005     |
| Forest                      | 0.941                            | 1.062     | 1.251     |
| Hydrological Features       | 0.341                            | 0.380     | 0.442     |
| Islands (coastal)           | 0.055                            | 0.060     | 0.067     |
| Livestock/Grazing Land      | 0.018                            | 0.024     | 0.031     |
| Marine Infrastructure       | 0.001                            | 0.001     | 0.003     |
| Mining                      | 0.000                            | 0.000     | 0.000     |
| Recreational                | 0.044                            | 0.051     | 0.061     |
| Residential                 | 0.295                            | 0.321     | 0.370     |
| Urban                       | 0.017                            | 0.025     | 0.030     |

**Table S13.** Summary of modelled inundation impacts on broad land use/land cover types in coastal areas, for a 100yr-type storm under different sea level scenarios. Values represent total combined areas for Grenada and Carriacou; land cover data for Petite Martinique were unavailable.

| Scenario                    | 100yr_050                        | 100yr_107 | 100yr_167 |
|-----------------------------|----------------------------------|-----------|-----------|
| Land use/land cover type    | Area affected (km <sup>2</sup> ) |           |           |
| Agriculture                 | 0.719                            | 1.027     | 1.271     |
| Airport Land/Infrastructure | 0.025                            | 0.027     | 0.029     |
| Aviation (i.e. runways)     | 0.006                            | 0.006     | 0.008     |
| Commercial & Industrial     | 0.024                            | 0.039     | 0.061     |
| Conservation Areas          | 0.373                            | 0.774     | 0.880     |
| Landfill & Degraded Land    | 0.004                            | 0.005     | 0.007     |
| Forest                      | 1.138                            | 1.282     | 1.488     |
| Hydrological Features       | 0.424                            | 0.467     | 0.554     |
| Islands (coastal)           | 0.058                            | 0.064     | 0.071     |
| Livestock/Grazing Land      | 0.031                            | 0.071     | 0.044     |
| Marine Infrastructure       | 0.001                            | 0.002     | 0.003     |
| Mining                      | 0.000                            | 0.000     | 0.000     |
| Recreational                | 0.044                            | 0.054     | 0.063     |
| Residential                 | 0.320                            | 0.390     | 0.466     |
| Urban                       | 0.019                            | 0.028     | 0.034     |
